# Supplementary material for: Physical activity and sedentary activity: population epidemiology and concordance in Australian children aged 11–12 years and their parents
Source: PubMed Central journal article supplement — BMJ Open. 2019 Jul 4;9(Suppl 3):136–46. doi: 10.1136/bmjopen-2018-023194 (PMC6624037; doi:10.1136/bmjopen-2018-023194), 2019-07-04
Supplement: bmjopen-2018-023194supp001.pdf [file bmjopen-2018-023194supp001.pdf]

## **APPENDIX 1: TRANSCRIPTION OF ACCELEROMETRY ACTIVITY CARDS** **RELIABILITY (AGREEMENT)**

Ten subjects (including children and parents) were randomly selected from subjects previously coded by each of four raters. Therefore, a random sample of 40 subjects (24 children and 16 parents) each coded by four raters was used. Agreement on the classification of log text data in to one of twelve categories was assessed (coding of what the subject was doing when the bracelet was off based upon the log book). There were potentially 12 days of log text for each coding and coders looked at the field that indicated whether the watch had ever been removed. We investigated the 23 subjects who provided reasons to remove the device on day 1. Rater disagreement only occurred when interpretation of text included an interpretation of 'other' by at least one rater. In four of these cases three raters agreed and coded entries as 'other' whilst one rater chose an alternative code. In the other two cases, two raters coded as 'other' and the other two raters agreed on the alternative code. For day 2, activity log text detailed that the watch was not worn in 16/40 (40%) of subjects. Disagreement between raters occurred in 4/16 (25%) cases. In all 4 cases, three of the raters agreed and one differed, again all contained at least one coding of 'other'.
